# Supplementary material for: Antigen-based multiplex strategies to discriminate SARS-CoV-2 natural and vaccine induced immunity from seasonal human coronavirus humoral responses
Source: bioRxiv or medRxiv preprint supplement (doi:10.1101/2021.02.10.21251518), 2021-02-12
Supplement: Supplementary file [file media-1.pdf]

1 **SUPPLEMENTARY APPENDIX.**

2 Antigen-based multiplex strategies to discriminate SARS-CoV-2 natural and vaccine induced  
3 immunity from seasonal human coronavirus humoral responses

4 Eric D. Laing<sup>1\*</sup>, Spencer L. Sterling<sup>1,2</sup>, Stephanie A. Richard<sup>2,3</sup>, Nusrat J. Epsi<sup>2,3</sup>, Si'Ana  
5 Coggins<sup>1,2</sup>, Emily C. Samuels<sup>1,2</sup>, Shreshta Phogat<sup>1,2</sup>, Lianying Yan<sup>1,2</sup>, Nicole Moreno<sup>2,3</sup>, Christian  
6 L. Coles<sup>2,3</sup>, Matthew Drew<sup>4</sup>, Jennifer Mehalko<sup>4</sup>, Caroline E. English<sup>2,3</sup>, Scott Merritt<sup>2,3,5</sup>, Katrin  
7 Mende<sup>2,3,5</sup>, Vincent J. Munster<sup>6</sup>, Emmie de Wit<sup>6</sup>, Kevin K. Chung<sup>7</sup>, Eugene V. Millar<sup>2,3</sup>, David R.  
8 Tribble<sup>3</sup>, Mark P. Simons<sup>1,3</sup>, Simon D. Pollett<sup>2,3</sup>, Brian K. Agan<sup>2,3</sup>, Dominic Esposito<sup>4</sup>, Charlotte  
9 Lanteri<sup>2</sup>, G. Travis Clifton<sup>5</sup>, Edward Mitre<sup>1</sup>, Timothy H. Burgess<sup>2</sup>, and Christopher C. Broder<sup>1\*</sup>

10  
11  
12  
13  
14  
15

**Table S1.  $\beta$ -CoV MMIA performance**

|                                          |             | SARS-CoV-2 PCR Status/Archival Sera |          |       |
|------------------------------------------|-------------|-------------------------------------|----------|-------|
|                                          |             | Positive                            | Negative | Total |
| SARS-CoV-2<br>spike IgM<br>Antibody Test | Positive    | 110                                 | 0        | 110   |
|                                          | Negative    | 40                                  | 84       | 124   |
|                                          | Total       | 150                                 | 84       | 234   |
|                                          | Sensitivity | 73.33%                              |          |       |
|                                          | Specificity | 100.00%                             |          |       |

16

**Table S2. IgG and IgM seropositivity within 28 days post-symptom onset (dps)**

| dspo    | IgG+          | IgG+/IgM+     |
|---------|---------------|---------------|
| 7 – 14  | 80.0% (12/15) | 73.3% (11/15) |
| 15 – 28 | 100% (31/31)  | 93.5% (29/31) |

18  
19  
20  
21  
22  
23  
24  
25  
26

27  
28  
29  
30  
31  
32  
33  
34  
35  
36  
37  
38  
39  
40  
41  
42  
43  
44  
45  
46  
47  
48

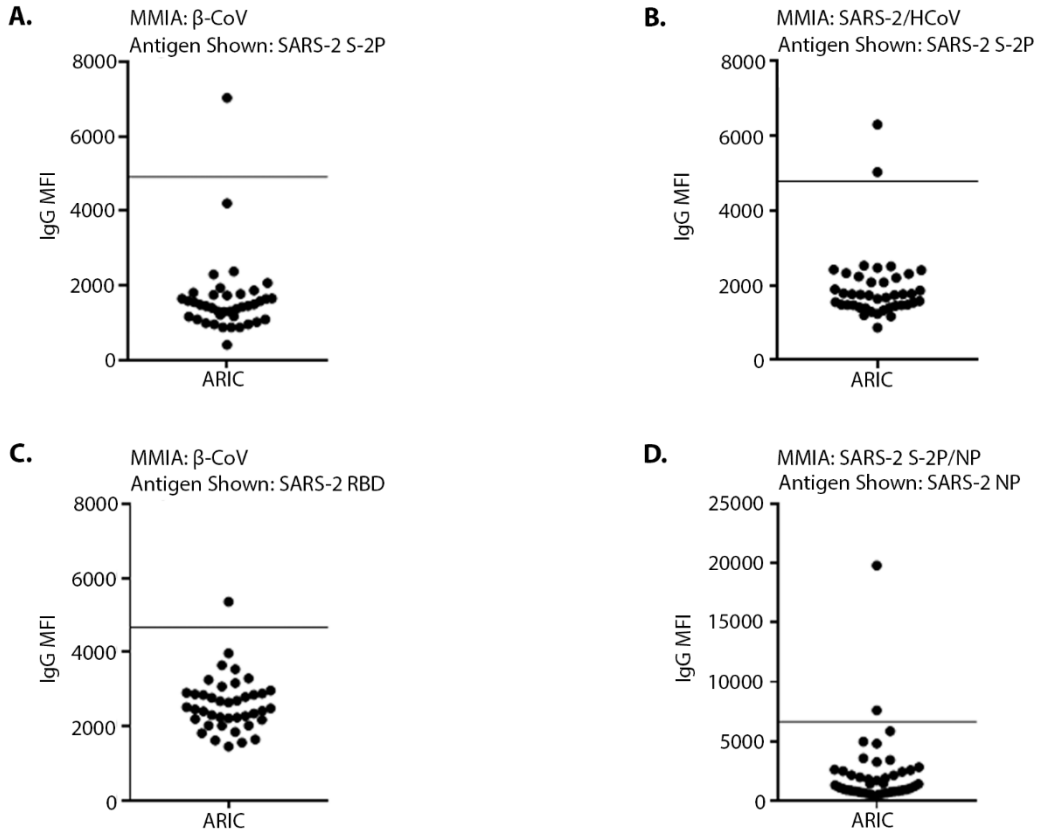

**Figure S1. 99.7% probability distribution threshold cutoffs for SARS-CoV-2 antigen**

**reactive IgG.** Convalescent serum samples (n=43) from SARS-CoV-2 naïve ARIC subjects with HCoV PCR-confirmed infections were tested with MMIA indicated in panels. Antigens shown as follows: **(A)** SARS-CoV-2 spike (S-2P), **(B)** SARS-CoV-2 spike (S-2P), **(C)** SARS-CoV-2 RBD, and **(D)** SARS-CoV-2 NP; sold lines indicate the mean+3SD (99.7%) MFI.

49  
50  
51  
52  
53  
54  
55  
56  
57  
58  
59  
60  
61  
62  
63  
64  
65  
66  
67  
68  
69

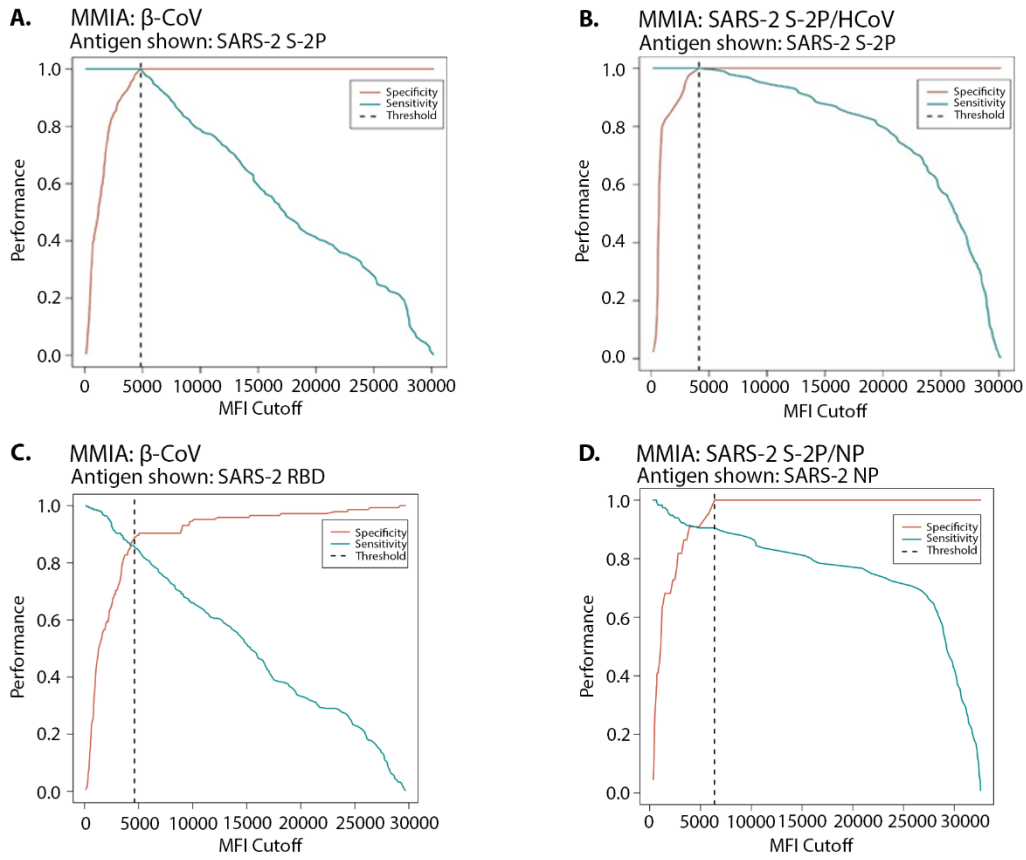

**Figure S2. Receiver operating characteristic (ROC) curve analysis of SARS-CoV-2 PCR-positive and -negative serum samples from the EPICC study provided a second measurement of threshold cutoffs for SARS-CoV-2 antigen reactive IgG. EPICC Sera were tested with MMIA indicated in panels; antigens shown as follows: (A) SARS-CoV-2 spike (S-2P), (B) SARS-CoV-2 spike (S-2P), (C) SARS-CoV-2 RBD, and (D) SARS-CoV-2 N**

70  
71  
72  
73  
74  
75  
76  
77  
78  
79  
80  
81  
82  
83  
84  
85  
86  
87  
88  
89  
90  
91  
92  
93  
94

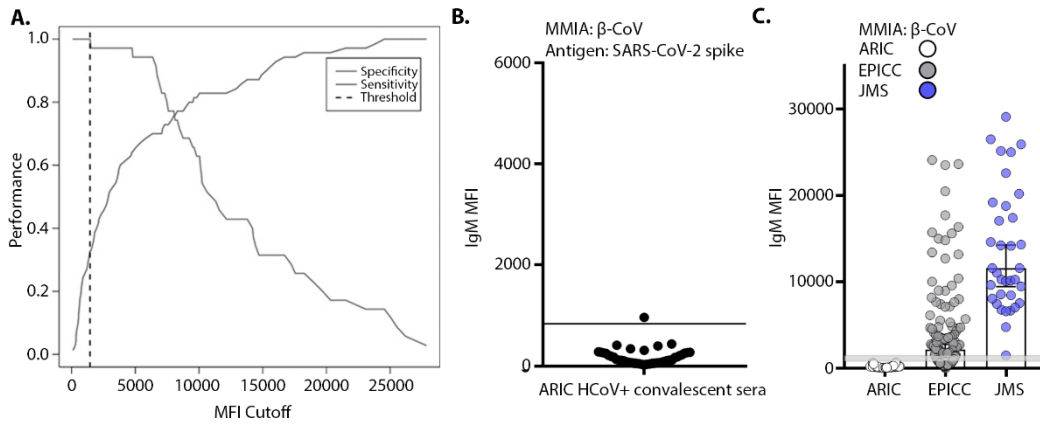

**Figure S3. SARS-CoV-2 spike reactive IgM detection with the  $\beta$ -CoV MMIA.**

**(A)** ROC curve analysis of SARS-CoV-2 spike protein IgM antibody reactivity in a  $\beta$ -CoV MMIA. PCR-confirmed SARS-CoV-2 positive and negative serum samples (n= 105) were tested and 100% specificity was achieved at threshold cutoff of 1446 MFI. **(B)** SARS-CoV-2 naïve ARIC HCoV PCR-positive convalescent serum samples (n=43) were tested to establish a 99.7% probability threshold (840 MFI). **(C)** ARIC (n=84), SARS-CoV-2 PCR-positive EPICC (n=116) and JMS (n=35) serum samples were tested in technical duplicates.
